# Supplementary material for: International patient preferences for physician attire: results from cross-sectional studies in four countries across three continents
Source: HighWire-hosted journal article supplement (doi:10.1136/bmjopen-2022-061092), 2022-10-01
Supplement: bmjopen-2022-061092supp002_data_supplement.pdf [file bmjopen-2022-061092supp002_data_supplement.pdf]

D

## Section B – Physician Attire - Preferences

Please provide your **ONE** best answer to each of the following questions

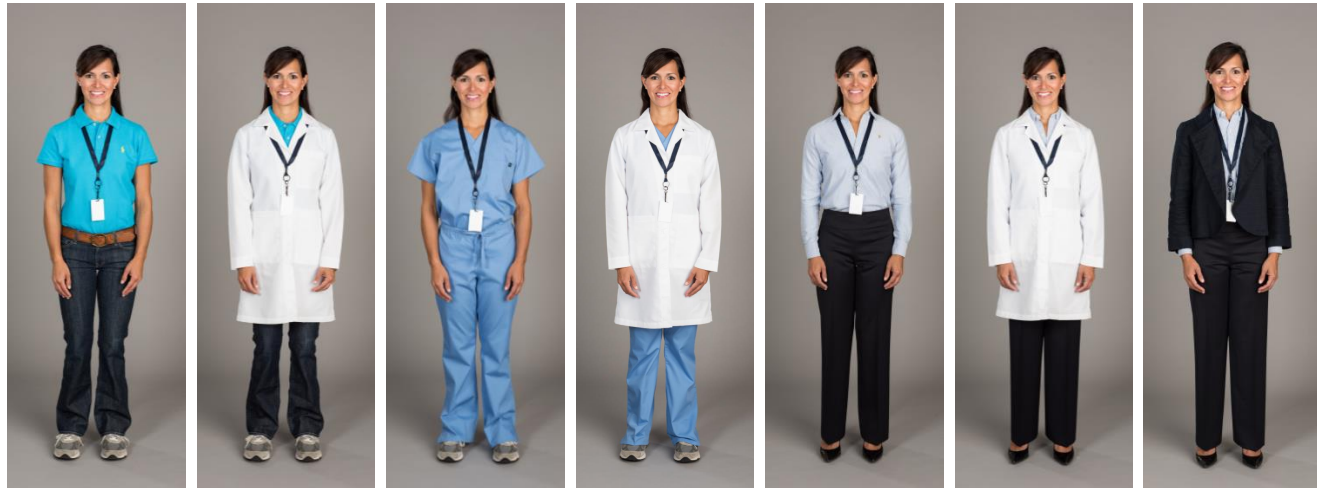**A****B****C****D****E****F****G**

6) Which doctor would you prefer for your **primary care doctor**? (Please select only ONE option)

**A****B****C****D****E****F****G**

7) Which doctor would you prefer to see when visiting the **emergency room**? (Please select only ONE option)

**A****B****C****D****E****F****G**

8) Which doctor would you prefer to see when **in the hospital**? (Please select only ONE option)

**A****B****C****D****E****F****G**

9) Which doctor would you prefer for your **surgeon**? (Please select only ONE option)

**A****B****C****D****E****F****G**

10) **Overall**, which clothes do you feel doctors should wear? (Please select only ONE option)

**A****B****C****D****E****F****G**

---

## Section C – General Physician Attire

*Please indicate your level of agreement with the following statements by checking ONE box to the left of your answer.*

---

11) How my doctor dresses is important to me.

Strongly Disagree                       Disagree                       Neither Agree nor Disagree                       Agree                       Strongly Agree

---

12) How my doctor dresses influences how happy I am with the care I receive.

Strongly Disagree                       Disagree                       Neither Agree nor Disagree                       Agree                       Strongly Agree

---

13) It is appropriate for a doctor to dress casually when seeing patients **over the weekend**.

Strongly Disagree                       Disagree                       Neither Agree nor Disagree                       Agree                       Strongly Agree

---

14) Doctors should wear a white coat when seeing patients **in their office or clinic**.

Strongly Disagree                       Disagree                       Neither Agree nor Disagree                       Agree                       Strongly Agree

---

15) Doctors should wear a white coat when seeing patients in the **emergency room**.

Strongly Disagree                       Disagree                       Neither Agree nor Disagree                       Agree                       Strongly Agree

---

16) Doctors should wear a white coat when seeing patients **in the hospital**.

Strongly Disagree                       Disagree                       Neither Agree nor Disagree                       Agree                       Strongly Agree

---

17) Doctors should always wear a white coat when seeing patients **in any setting**.

Strongly Disagree                       Disagree                       Neither Agree nor Disagree                       Agree                       Strongly Agree

D

---

**Section D – Demographics*****Please remember that all of your answers will be kept confidential.***

18) How old are you?

- 18-25                       26-34                       35-54                       55-64                       65 or older

19) What is your gender?

- Male                       Female

20) What is the highest level of education you have completed?

- Less than High School       High School                       Some College                       College                       Graduate Degree

21) What is your race?

- American Indian/Alaska Native       Asian                       Native Hawaiian or Other Pacific Islander  
 Black or African American               White                       Hispanic  
 Other (Please specify) \_\_\_\_\_

22) How many different doctors have you seen in the past year?

- 0                       1                       2                       3                       4                       5                       6 or more
- 

**Thank you for taking the time to fill out our survey.  
Your input is greatly appreciated.**
